# Supplementary material for: AtFUT4 and AtFUT6 Are Arabinofuranose-Specific Fucosyltransferases
Source: PubMed Central journal article supplement (PMC7900004; doi:10.3389/fpls.2021.589518), 2021-02-09
Supplement: Data_Sheet_1.pdf [file Data_Sheet_1.pdf]

## *Supplementary Material*

### ***AtFUT4* and *AtFUT6* are Arabinofuranose-specific Fucosyltransferases**

Maria J. Soto<sup>1,2,3</sup>, Pradeep Kumar Prabahkar<sup>2,4,5</sup>, Hsin-Tzu Wang<sup>2,4,5</sup>, Jason Backe<sup>2,4</sup>,  
Digantkumar Chapla<sup>2,5</sup>, Max Bartetzko<sup>6</sup>, Ian Black<sup>2</sup>, Parastoo Azadi<sup>2,5</sup>, Maria J. Pena<sup>2,4</sup>,  
Fabian Pfrenge<sup>6,7</sup>, Kelley W. Moremen<sup>2,5</sup>, Breeanna R. Urbanowicz<sup>2,4,5\*</sup>, and Michael G.  
Hahn<sup>2,3,4\*</sup>

**Supplementary Table 1. Sequences of primers used to amplify truncated GFP-*AtFUT4* and GFP-*AtFUT6*, and for the amplification of the native *AtFUT4* and *AtFUT6* promoter regions for subsequent GUS transformation.**

The underlined regions in the primers sequences for *AtFUT4* and *AtFUT6* specify the partial attB adapter sequences used in the first round of PCR amplification. Expression and secretion of the GFP-*AtFUT4* and GFP-*AtFUT6* fusion-proteins was determined by measuring the fluorescence of the recombinant proteins in the media used to transiently transfect the HEK293 cells. The concentration of secreted fusion protein in mg/L is shown in parentheses and was estimated based on GFP fluorescence (13.1 fluorescence units = 1 mg/L).

| Enzyme/Gene           | Amino Acid Truncation | Primer Sequence 5' - 3'                       | GFP Fluorescence      |
|-----------------------|-----------------------|-----------------------------------------------|-----------------------|
| <i>AtFUT4</i> _F      | $\Delta$ _54          | <u>AACTTGTA</u> CTTTCAAGGCAACGACGAATCCGAAACA  | 1423<br>(108.62 mg/L) |
| <i>AtFUT4</i> _R      |                       | ACAAGAAAGCTGGGTCCTATAACTCATCAAAAAGCT          |                       |
| <i>AtFUT6</i> _F      | $\Delta$ _43          | <u>AACTTGTA</u> CTTTCAAGGCAACGACTTCAACAACCAAC | 1028<br>(77.8 mg/L)   |
| <i>AtFUT6</i> _R      |                       | ACAAGAAAGCTGGGTCCTATAACTCATCAAATAGCTTA        |                       |
| <i>AtFUT4</i> ::GUS_F |                       | AAGCTTTTGTGCTCGCTTGAATCAGAAG                  | N/A                   |
| <i>AtFUT4</i> ::GUS_R |                       | GGATCCGTTGACTTTTAGTTTGTGAAGATGATT             |                       |
| <i>AtFUT6</i> ::GUS_F |                       | GGATCCCTTCAAACCAAAAAGCTCTG                    | N/A                   |
| <i>AtFUT6</i> ::GUS_R |                       | AAGCTTATTTTACAAATCGAAACAG                     |                       |

**Supplementary Table 2. <sup>1</sup>H NMR signal assignments of arabinotriose incubated with GDP-Fuc and GFP-AtFUT4.**

(A.) Reaction without the enzyme (control) and after (B) incubation with the enzyme. <sup>1</sup>Chemical shifts are reported in ppm relative to internal dimethyl sulfoxide,  $\delta_H$  2.721.

| <b>Residue</b>                          | <b>H1</b> | <b>H2</b>                                                           | <b>H3</b> | <b>H4</b> | <b>H5<sub>a,b</sub></b> | <b>H6</b> |
|-----------------------------------------|-----------|---------------------------------------------------------------------|-----------|-----------|-------------------------|-----------|
| <b>Chemical Shift (ppm)<sup>1</sup></b> |           |                                                                     |           |           |                         |           |
| <b>A.</b>                               |           | <b><i>α-L-Araf-(1,5)-α-L-Araf-(1,5)-α-L-Araf</i></b>                |           |           |                         |           |
| <i>T-α-l-Araf</i>                       | 5.090     | 4.13                                                                | 3.95      | 4.09      | 3.83-3.72               |           |
| <i>5-α-l-Araf</i>                       | 5.084     | 4.13                                                                | 4.22      | 3.89      | 3.80<br>7.7             |           |
| <i>5-α-l-Araf</i>                       | 5.258     | 4.03                                                                | 4.03      | 4.23      | 3.86-3.76               |           |
| <i>5-β-l-Araf</i>                       | 5.294     | 4.09                                                                | 4.00      | 4.23      | 3.86-3.76               |           |
| <b>B.</b>                               |           | <b><i>α-L-Fucp-(1,2)-α-L-Araf-(1,5)-α-L-Araf-(1,5)-α-L-Araf</i></b> |           |           |                         |           |
| <i>T-α-l-Fucp</i>                       | 5.076     | 3.79                                                                | 3.89      | 3.8       | 4.08                    | 1.24      |
| <i>2-α-l-Araf</i>                       | 5.196     | 4.14                                                                | 4.10      | 4.10      | 3.835-3.724             |           |
| <i>5-α-l-Araf</i>                       | 5.084     | 4.13                                                                | 4.22      | 3.89      | 3.80<br>7.7             |           |
| <i>5-α-l-Araf</i>                       | 5.258     | 4.03                                                                | 4.03      | 4.23      | 3.86-3.76               |           |
| <i>5-β-l-Araf</i>                       | 5.294     | 4.09                                                                | 4.00      | 4.23      | 3.86-3.76               |           |

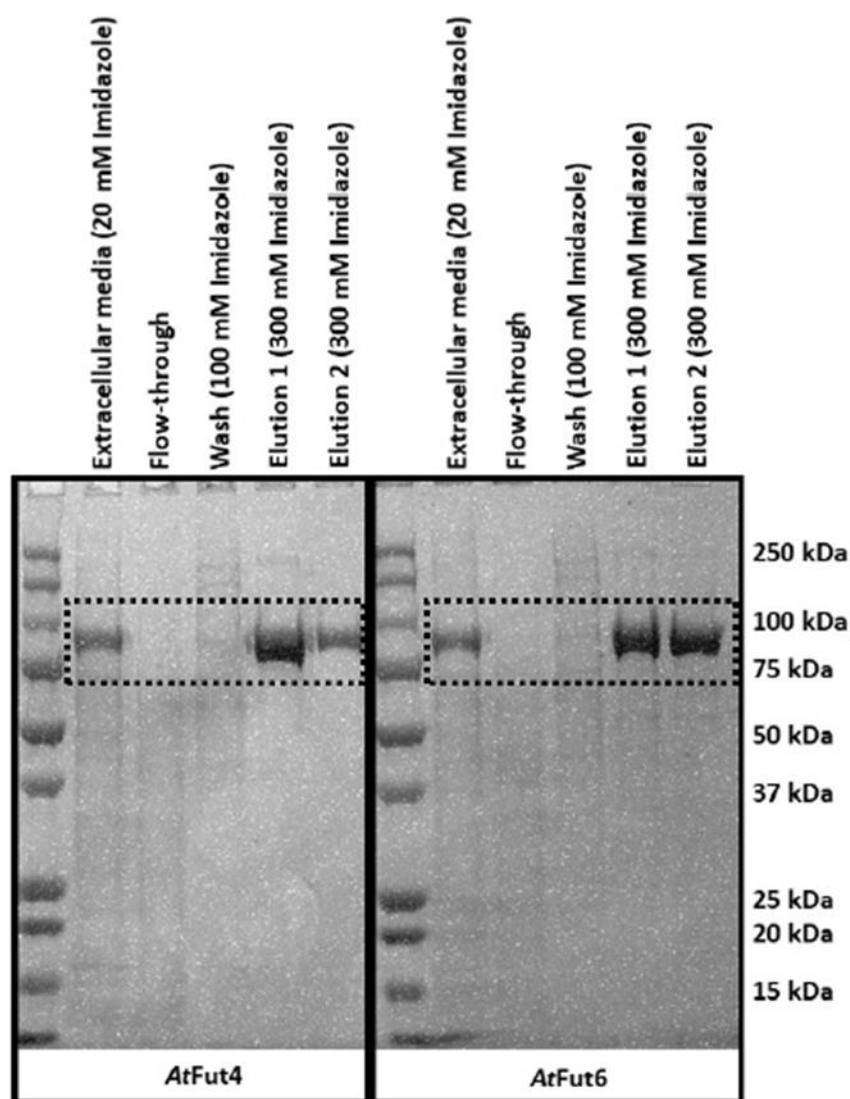

**Supplementary Figure S1. Purification of GFP-AtFUT4 and GFP-AtFUT6 using immobilized metal affinity chromatography (IMAC).**

SDS-PAGE of purification of GFP-AtFUT4 and GFP-AtFUT6. Respective protein bands are highlighted in the dashed boxes. All buffers contain 50 mM HEPES and 400 mM NaCl, pH 7.2, and the concentration of imidazole used during the purification is indicated.

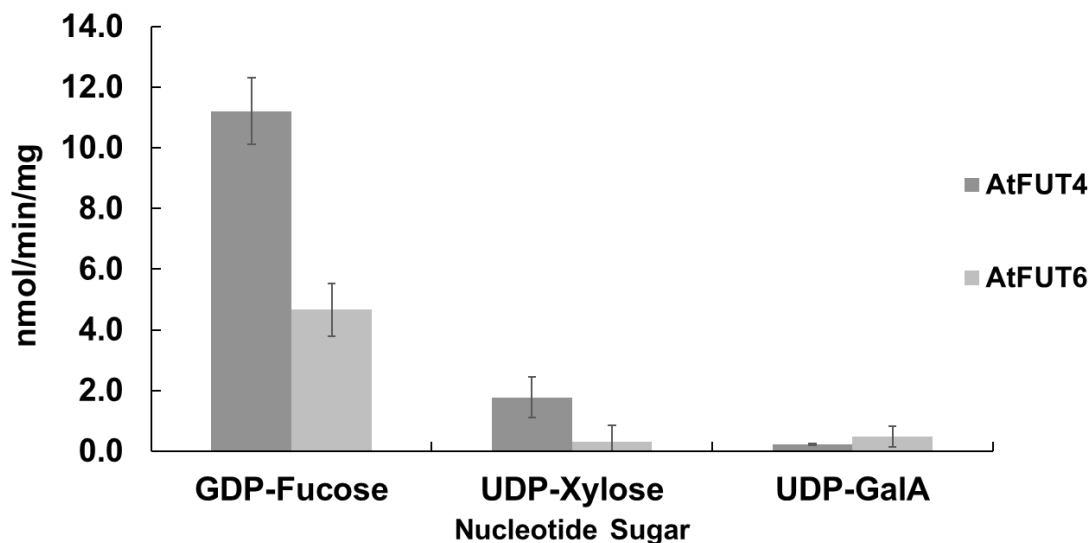

**Supplementary Figure 2. Hydrolysis of GDP-Fucose, UDP-Xylose, and UDP-GalA by GFP-*AtFUT4* and GFP-*AtFUT6*.**

Enzyme hydrolysis activity for *AtFUT4*, and *AtFUT6* was measured based on the production of GDP or UDP using the GDP-Glo and UDP-Glo assay kits in the absence of acceptor substrates. Enzyme assays consisted of 150 ng of enzyme and 100  $\mu$ M of nucleotide sugars and were incubated for 20 minutes.
